# Supplementary material for: An efficient way of increasing the total entropy of mixing in high-entropy-alloy compounds: a case of NaCl-type (Ag,In,Pb,Bi)Te1−xSex (x = 0.0, 0.25, 0.5) superconductors
Source: Royal Society of Chemistry journal article supplement (doi:10.1039/d0dt01880e), 2020-01-01
Supplement: d0dt01880e1.pdf [file d0dt01880e1.pdf]

## Supplementary material

### Efficient way of increasing total entropy of mixing in high-entropy-alloy compounds: a case of NaCl-type $(\text{Ag}, \text{In}, \text{Pb}, \text{Bi})\text{Te}_{1-x}\text{Se}_x$ ( $x = 0.0, 0.25, 0.5$ ) superconductors

Aichi Yamashita<sup>a, \*</sup>, Rajveer Jha<sup>a</sup>, Yosuke Goto<sup>a</sup>, Tatsuma D. Matsuda<sup>a</sup>, Yuji Aoki<sup>a</sup>, and Yoshikazu Mizuguchi<sup>a</sup>

<sup>a</sup>*Department of Physics, Tokyo Metropolitan University, 1-1 Minami-Osawa, Hachioji, Tokyo, 192-0397, Japan*

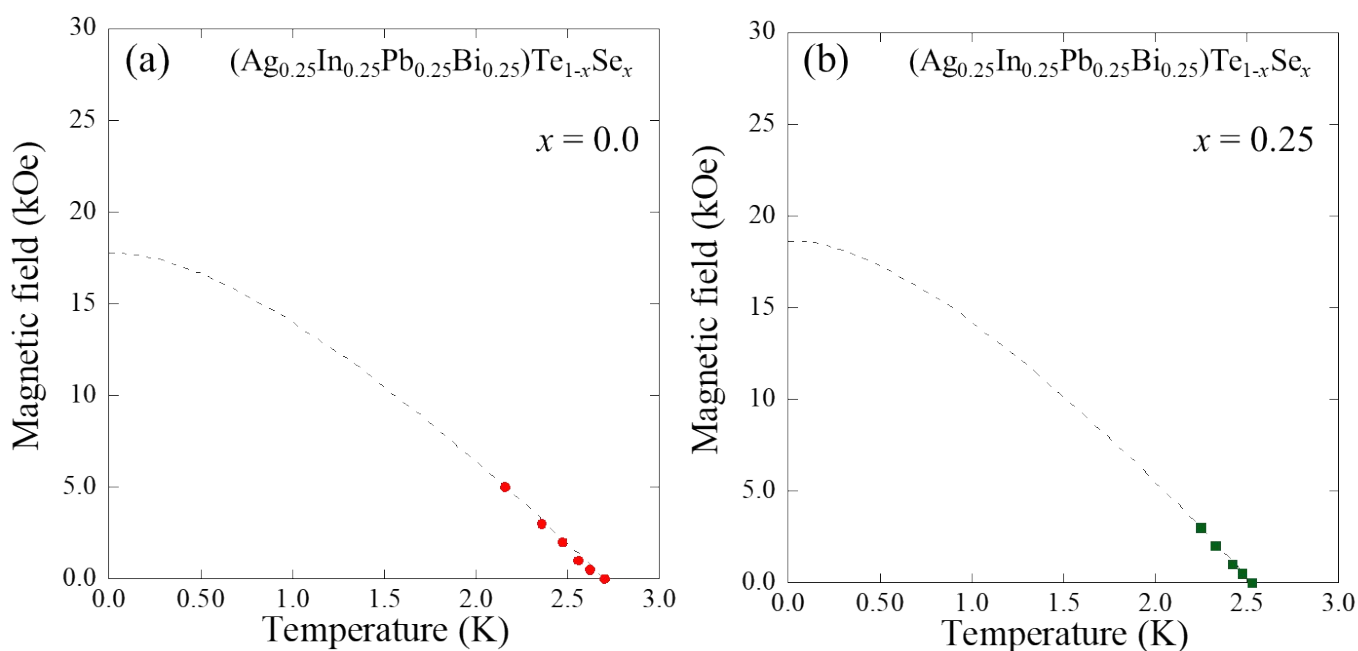

Fig. S1. Temperature dependence of  $H_{c2}$  for (a)  $x = 0$  and (b)  $x = 0.25$  where  $T_c^{\text{onset}}$  was estimated as the temperature where the resistivity becomes 90% of normal state resistivity at 3.0 K. The dashed lines are the WHH fitting results.

Table S1. Chemical composition,  $\Delta S_{\text{mix}}/R$  (Site 1),  $\Delta S_{\text{mix}}/R$  (Site 2),  $\Delta S_{\text{mix}}/R$  (Total), transition temperature ( $T_c^{\text{onset}}$ ),  $H_{c2}(0)$ , lattice constant  $a$  (Å), lattice constant  $c$  (Å), and type of the structure of the high-entropy-alloy and/or medium-entropy-alloy superconductors.

| HEA superconductor                                                                                                                                                  | $\Delta S_{\text{mix}}/R$<br>(site1) | $\Delta S_{\text{mix}}/R$<br>(site2) | $\Delta S_{\text{mix}}/R$<br>(Total) | $T_c$ (K) | $H_{c2}(0)$<br>(kOe) | Lattice $a$ (Å) | Lattice $c$ (Å) | Structure     | Reference                                                                                                                        |
|---------------------------------------------------------------------------------------------------------------------------------------------------------------------|--------------------------------------|--------------------------------------|--------------------------------------|-----------|----------------------|-----------------|-----------------|---------------|----------------------------------------------------------------------------------------------------------------------------------|
| (Ag <sub>0.24</sub> In <sub>0.22</sub> Pb <sub>0.27</sub> Bi <sub>0.26</sub> )Te <sub>1.02</sub>                                                                    | 1.37                                 | 0.00                                 | 1.37                                 | 2.7       | 18                   | 6.237           | -               | <i>Fm-3m</i>  | This work                                                                                                                        |
| (Ag <sub>0.29</sub> In <sub>0.26</sub> Pb <sub>0.22</sub> Bi <sub>0.24</sub> )Te <sub>0.78</sub> Se <sub>0.20</sub>                                                 | 1.38                                 | 0.51                                 | 1.89                                 | 2.5       | 19                   | 6.176           | -               | <i>Fm-3m</i>  |                                                                                                                                  |
| (Ag <sub>0.34</sub> In <sub>0.15</sub> Pb <sub>0.24</sub> Bi <sub>0.29</sub> )Te <sub>0.65</sub> Se <sub>0.34</sub>                                                 | 1.35                                 | 0.65                                 | 2.00                                 | 2.0       | -                    | 6.121           | -               | <i>Fm-3m</i>  |                                                                                                                                  |
| Ag <sub>0.20</sub> Cd <sub>0.20</sub> Sn <sub>0.20</sub> Sb <sub>0.15</sub> Pb <sub>0.20</sub> Te <sub>1.05</sub>                                                   | 1.60                                 | 0.00                                 | 1.60                                 | 1.2       | -                    | 6.186           | -               | <i>Fm-3m</i>  | Md. R. Kasem et al.,<br>Appl. Phys. Express <b>13</b> , 033001 (2020)                                                            |
| Ag <sub>0.24</sub> In <sub>0.22</sub> Sn <sub>0.18</sub> Sb <sub>0.14</sub> Pb <sub>0.15</sub> Te <sub>1.03</sub>                                                   | 1.59                                 | 0.00                                 | 1.59                                 | 1.4       | -                    | 6.202           | -               | <i>Fm-3m</i>  |                                                                                                                                  |
| Ag <sub>0.22</sub> Cd <sub>0.22</sub> In <sub>0.23</sub> Sn <sub>0.17</sub> Sb <sub>0.14</sub> Te <sub>1.02</sub>                                                   | 1.59                                 | 0.00                                 | 1.59                                 | 0.7       | -                    | 6.098           | -               | <i>Fm-3m</i>  |                                                                                                                                  |
| Ag <sub>0.19</sub> Cd <sub>0.19</sub> Sn <sub>0.20</sub> Pb <sub>0.18</sub> Bi <sub>0.21</sub> Te <sub>1.03</sub>                                                   | 1.61                                 | 0.00                                 | 1.61                                 | 1.0       | -                    | 6.244           | -               | <i>Fm-3m</i>  |                                                                                                                                  |
| Ag <sub>0.21</sub> Cd <sub>0.19</sub> In <sub>0.25</sub> Pb <sub>0.16</sub> Bi <sub>0.18</sub> Te <sub>1.00</sub>                                                   | 1.60                                 | 0.00                                 | 1.60                                 | 1.0       | -                    | 6.189           | -               | <i>Fm-3m</i>  |                                                                                                                                  |
| Ag <sub>0.21</sub> Cd <sub>0.21</sub> In <sub>0.24</sub> Sn <sub>0.19</sub> Bi <sub>0.19</sub> Te <sub>0.97</sub>                                                   | 1.61                                 | 0.00                                 | 1.61                                 | 1.0       | -                    | 6.136           | -               | <i>Fm-3m</i>  |                                                                                                                                  |
| Ag <sub>0.20</sub> In <sub>0.20</sub> Sn <sub>0.22</sub> Pb <sub>0.19</sub> Bi <sub>0.20</sub> Te <sub>0.98</sub>                                                   | 1.61                                 | 0.00                                 | 1.61                                 | 2.8       | 19                   | 6.255           | -               | <i>Fm-3m</i>  | Y. Mizuguchi,<br>J. Phys. Soc. Jpn. <b>88</b> , 124708 (2019)                                                                    |
| (TaNb) <sub>0.67</sub> (HfZrTi) <sub>0.33</sub>                                                                                                                     | 1.46                                 | -                                    | 1.46                                 | 7.7       | 80                   | 3.340           | -               | bcc           | J. Guo et al.,<br>Proc. Natl. Acad. Sci. USA <b>114</b> , 13144 (2017)                                                           |
| (TaNb) <sub>0.70</sub> (ZrHfTi) <sub>0.30</sub>                                                                                                                     | 1.43                                 | -                                    | 1.43                                 | 8.0       | 67                   | 3.29~3.33       | -               | bcc           | F. O. von Rohr et al.,<br>Phys. Rev. Mater. <b>2</b> , 034801 (2018)                                                             |
| (TaNb) <sub>0.70</sub> (ZrHfTi) <sub>0.33</sub>                                                                                                                     | 1.24                                 | -                                    | 1.24                                 | 7.8       | 78                   | 3.29~3.33       | -               | bcc           |                                                                                                                                  |
| (TaNb) <sub>0.70</sub> (ZrHfTi) <sub>0.40</sub>                                                                                                                     | 1.31                                 | -                                    | 1.31                                 | 7.6       | 84                   | 3.29~3.33       | -               | bcc           |                                                                                                                                  |
| (TaNb) <sub>0.70</sub> (ZrHfTi) <sub>0.50</sub>                                                                                                                     | 1.39                                 | -                                    | 1.39                                 | 6.5       | 117                  | 3.29~3.33       | -               | bcc           |                                                                                                                                  |
| (TaNb) <sub>0.70</sub> (ZrHfTi) <sub>0.84</sub>                                                                                                                     | 1.60                                 | -                                    | 1.60                                 | 4.5       | 90                   | 3.29~3.33       | -               | bcc           |                                                                                                                                  |
| (TaNb) <sub>0.67</sub> (Hf) <sub>0.33</sub>                                                                                                                         | 1.10                                 | -                                    | 1.10                                 | 7.3       | -                    | 3.29~3.33       | -               | bcc           |                                                                                                                                  |
| (TaNb) <sub>0.67</sub> (HfZr) <sub>0.33</sub>                                                                                                                       | 1.33                                 | -                                    | 1.33                                 | 6.6       | -                    | 3.29~3.33       | -               | bcc           |                                                                                                                                  |
| Nb <sub>0.67</sub> (HfZrTi) <sub>0.33</sub>                                                                                                                         | 1.00                                 | -                                    | 1.00                                 | 9.2       | -                    | 3.29~3.33       | -               | bcc           |                                                                                                                                  |
| (NbV) <sub>0.67</sub> (HfZrTi) <sub>0.33</sub>                                                                                                                      | 1.46                                 | -                                    | 1.46                                 | 7.2       | -                    | 3.29~3.33       | -               | bcc           |                                                                                                                                  |
| (TaV) <sub>0.67</sub> (HfZrTi) <sub>0.33</sub>                                                                                                                      | 1.46                                 | -                                    | 1.46                                 | 4.0       | -                    | 3.29~3.33       | -               | bcc           |                                                                                                                                  |
| (TaNb) <sub>0.67</sub> (HfZrTi) <sub>0.33</sub>                                                                                                                     | 1.46                                 | -                                    | 1.46                                 | 7.3       | -                    | 3.29~3.33       | -               | bcc           | K. Stolze et al.,<br>Chem. Mater. <b>30</b> , 906 (2018)                                                                         |
| (TaNbV) <sub>0.67</sub> (HfZrTi) <sub>0.33</sub>                                                                                                                    | 1.73                                 | -                                    | 1.73                                 | 4.3       | -                    | 3.29~3.33       | -               | bcc           |                                                                                                                                  |
| (ScZrNbTa) <sub>0.65</sub> (RhPd) <sub>0.35</sub>                                                                                                                   | 1.18                                 | 0.61                                 | 1.79                                 | 9.3       | 107                  | 3.278           | -               | CsCl          |                                                                                                                                  |
| (ScZrNb) <sub>0.63</sub> (RhPd) <sub>0.37</sub>                                                                                                                     | 1.16                                 | 0.62                                 | 1.79                                 | 7.5       | 96                   | 3.278~3.29      | -               | CsCl          |                                                                                                                                  |
| (ScZrNb) <sub>0.62</sub> (RhPd) <sub>0.38</sub>                                                                                                                     | 1.16                                 | 0.63                                 | 1.79                                 | 6.4       | 89                   | 3.278~3.29      | -               | CsCl          |                                                                                                                                  |
| (ScZrNb) <sub>0.60</sub> (RhPd) <sub>0.40</sub>                                                                                                                     | 1.14                                 | 0.64                                 | 1.78                                 | 3.9       | 21                   | 3.278~3.29      | -               | CsCl          | P. Koželj et al., Phys. Rev. Lett. <b>113</b> , 107001 (2014),<br>S. Marik et al., J. Alloys Compd. <b>695</b> , 3530 (2017)     |
| Ta <sub>0.34</sub> Nb <sub>0.33</sub> Hf <sub>0.08</sub> Zr <sub>0.14</sub> Ti <sub>0.11</sub>                                                                      | 1.45                                 | -                                    | 1.45                                 | 7.3       | 82                   | 3.360           | -               | bcc           | S. Marik et al., Phys. Rev. Mater. <b>3</b> , 060602 (2019)                                                                      |
| [Nb <sub>0.11</sub> Re <sub>0.56</sub> ][HfZrTi] <sub>0.33</sub>                                                                                                    | 0.73                                 | 0.57                                 | 1.30                                 | 4.4       | 36                   | 5.255           | 8.593           | hcp           | N. Ishizu et al., Results in Phys. <b>13</b> , 102275 (2019)                                                                     |
| Hf <sub>0.21</sub> Nb <sub>0.25</sub> Ti <sub>0.15</sub> V <sub>0.15</sub> Zr <sub>0.24</sub>                                                                       | 1.59                                 | -                                    | 1.59                                 | 5.3       | -                    | 3.401           | -               | bcc           | Y. Yuan et al., Front. Mater. <b>5</b> , 72 (2018)                                                                               |
| Ta <sub>0.35</sub> Nb <sub>0.35</sub> Zr <sub>0.15</sub> Ti <sub>0.15</sub>                                                                                         | 1.30                                 | -                                    | 1.30                                 | 8.0       | 116                  | 3.329           | -               | bcc           | K. Stolze et al., J. Mater. Chem. C <b>6</b> , 10441 (2018)                                                                      |
| (ZrNb) <sub>0.20</sub> (MoReRu) <sub>0.80</sub>                                                                                                                     | 1.52                                 | -                                    | 1.52                                 | 4.2       | -                    | 9.701           | -               | bcc           |                                                                                                                                  |
| (ZrNb) <sub>0.10</sub> (MoReRu) <sub>0.90</sub>                                                                                                                     | 1.38                                 | -                                    | 1.38                                 | 5.3       | 79                   | 9.613           | -               | bcc           |                                                                                                                                  |
| (HfTaWIr) <sub>0.6</sub> Re <sub>0.4</sub>                                                                                                                          | 1.50                                 | -                                    | 1.50                                 | 1.9       | -                    | 9.778           | -               | bcc+hcp       |                                                                                                                                  |
| (HfTaWIr) <sub>0.5</sub> Re <sub>0.5</sub>                                                                                                                          | 1.39                                 | -                                    | 1.39                                 | 2.7       | -                    | 9.741           | -               | bcc+hcp       |                                                                                                                                  |
| (HfTaWIr) <sub>0.4</sub> Re <sub>0.6</sub>                                                                                                                          | 1.23                                 | -                                    | 1.23                                 | 4.0       | 47                   | 9.723           | -               | bcc           |                                                                                                                                  |
| (HfTaWIr) <sub>0.3</sub> Re <sub>0.7</sub>                                                                                                                          | 1.03                                 | -                                    | 1.03                                 | 4.5       | -                    | 9.662           | -               | bcc           |                                                                                                                                  |
| (HfTaWIr) <sub>0.2</sub> Re <sub>0.8</sub>                                                                                                                          | 0.78                                 | -                                    | 0.78                                 | 5.7       | -                    | 9.638           | -               | bcc           |                                                                                                                                  |
| (HfTaWPt) <sub>0.5</sub> Re <sub>0.5</sub>                                                                                                                          | 1.39                                 | -                                    | 1.39                                 | 2.2       | -                    | 9.726           | -               | bcc+hcp       |                                                                                                                                  |
| (HfTaWPt) <sub>0.4</sub> Re <sub>0.6</sub>                                                                                                                          | 1.23                                 | -                                    | 1.23                                 | 4.4       | 59                   | 9.683           | -               | bcc           |                                                                                                                                  |
| (HfTaWPt) <sub>0.3</sub> Re <sub>0.7</sub>                                                                                                                          | 1.03                                 | -                                    | 1.03                                 | 5.7       | -                    | 9.648           | -               | bcc           |                                                                                                                                  |
| (HfTaWPt) <sub>0.25</sub> Re <sub>0.75</sub>                                                                                                                        | 0.91                                 | -                                    | 0.91                                 | 6.1       | -                    | 9.636           | -               | bcc           |                                                                                                                                  |
| Nb <sub>26.1</sub> Ta <sub>25.1</sub> Ti <sub>23.4</sub> Zr <sub>20.254</sub>                                                                                       | 1.39                                 | -                                    | 1.39                                 | 8.3       | 14                   | 3.373           | -               | bcc           |                                                                                                                                  |
| Nb <sub>0.198</sub> Ta <sub>0.189</sub> Ti <sub>0.208</sub> Zr <sub>0.187</sub> Hf <sub>0.218</sub>                                                                 | 1.61                                 | -                                    | 1.61                                 | 7.1       | 20                   | 3.405           | -               | bcc           |                                                                                                                                  |
| Nb <sub>0.163</sub> Ta <sub>0.157</sub> Ti <sub>0.169</sub> Zr <sub>0.171</sub> Hf <sub>0.175</sub> V <sub>0.165</sub>                                              | 1.79                                 | -                                    | 1.79                                 | 5.1       | 20                   | 3.357           | -               | bcc           |                                                                                                                                  |
| Nb <sub>0.2</sub> Ta <sub>0.2</sub> Ti <sub>0.2</sub> Zr <sub>0.2</sub> Fe <sub>0.2</sub>                                                                           | 1.61                                 | -                                    | 1.61                                 | 6.9       | -                    | -               | -               | bcc           | K. Y. Wu et al., Nat. Sci. J. <b>10</b> , 110 (2018)                                                                             |
| Nb <sub>0.2</sub> Ta <sub>0.2</sub> Ti <sub>0.2</sub> Zr <sub>0.2</sub> Ge <sub>0.2</sub>                                                                           | 1.61                                 | -                                    | 1.61                                 | 8.4       | 13                   | -               | -               | bcc           |                                                                                                                                  |
| Nb <sub>0.2</sub> Ta <sub>0.2</sub> Ti <sub>0.2</sub> Zr <sub>0.2</sub> Si <sub>0.2</sub> V <sub>0.2</sub>                                                          | 1.79                                 | -                                    | 1.79                                 | 4.3       | -                    | -               | -               | bcc           |                                                                                                                                  |
| Nb <sub>0.2</sub> Ta <sub>0.2</sub> Ti <sub>0.2</sub> Zr <sub>0.2</sub> Si <sub>0.2</sub> Ge <sub>0.2</sub>                                                         | 1.79                                 | -                                    | 1.79                                 | 7.4       | 9                    | -               | -               | bcc           | Y. Shukunami et al., Physica C <b>572</b> , 1353623 (2020)                                                                       |
| (Y <sub>0.28</sub> Nd <sub>0.16</sub> Sm <sub>0.18</sub> Eu <sub>0.18</sub> Gd <sub>0.20</sub> )Ba <sub>2</sub> Cu <sub>3</sub> O <sub>7-d</sub>                    | 1.59                                 | 0.00                                 | 1.59                                 | 93.0      | -                    | 3.845           | -               | <i>Pmmm</i>   |                                                                                                                                  |
| (Y <sub>0.18</sub> La <sub>0.24</sub> Nd <sub>0.14</sub> Sm <sub>0.14</sub> Eu <sub>0.15</sub> Gd <sub>0.15</sub> )Ba <sub>2</sub> Cu <sub>3</sub> O <sub>7-d</sub> | 1.77                                 | 0.00                                 | 1.77                                 | 93.0      | -                    | 3.864           | -               | <i>Pmmm</i>   | R. Sogabe et al., Appl. Phys. Express <b>11</b> , 053102 (2018),<br>R. Sogabe et al., Solid State Commun. <b>295</b> , 43 (2019) |
| (La <sub>0.2</sub> Ce <sub>0.2</sub> Pr <sub>0.2</sub> Nd <sub>0.2</sub> Sm <sub>0.2</sub> )O <sub>0.5</sub> F <sub>0.5</sub> BiS <sub>2</sub>                      | 1.61                                 | 0.69                                 | 2.30                                 | 4.3       | -                    | 4.020           | 13.417          | <i>P4/nmm</i> | R. Sogabe et al., Appl. Phys. Express <b>11</b> , 053102 (2018)                                                                  |
| (La <sub>0.3</sub> Ce <sub>0.3</sub> Pr <sub>0.2</sub> Nd <sub>0.1</sub> Sm <sub>0.1</sub> )O <sub>0.5</sub> F <sub>0.5</sub> BiS <sub>2</sub>                      | 1.50                                 | 0.69                                 | 2.20                                 | 3.4       | -                    | 4.036           | 13.402          | <i>P4/nmm</i> |                                                                                                                                  |
| (La <sub>0.1</sub> Ce <sub>0.1</sub> Pr <sub>0.3</sub> Nd <sub>0.3</sub> Sm <sub>0.2</sub> )O <sub>0.5</sub> F <sub>0.5</sub> BiS <sub>2</sub>                      | 1.50                                 | 0.69                                 | 2.20                                 | 4.7       | -                    | 4.012           | 13.419          | <i>P4/nmm</i> |                                                                                                                                  |
| (La <sub>0.1</sub> Ce <sub>0.1</sub> Pr <sub>0.2</sub> Nd <sub>0.3</sub> Sm <sub>0.3</sub> )O <sub>0.5</sub> F <sub>0.5</sub> BiS <sub>2</sub>                      | 1.50                                 | 0.69                                 | 2.20                                 | 4.9       | -                    | 4.008           | 13.431          | <i>P4/nmm</i> |                                                                                                                                  |
